# Supplementary material for: Renal Hyperfiltration and Arterial Stiffness in Humans With Uncomplicated Type 1 Diabetes
Source: Oxford University Press journal article supplement (doi:10.2337/dc10-0767), 2010-06-28
Supplement: dc100767onlineappendix.pdf [file dc100767onlineappendix.pdf]

**Electronic Table A: Inclusion criteria**

1. The Research Ethics Board at the Hospital for Sick Children (Toronto, Canada) approved the protocol
2. Duration of type 1 DM  $\geq 5$  years, age  $\geq 16$  years
3. Tanner Stage 4–5 puberty
4. Normoalbuminuria [24 hour urine albumin excretion rate (AER)  $< 20$   $\mu\text{g}/\text{min}$
5. Clinic blood pressure  $< 140/90$  mmHg
6. No microvascular disease
7. No macrovascular disease
8. Non-smokers
9. No regular medication
10. Absence of chronic illness
11. Dietary sodium ( $> 140$  mmol/day) and protein ( $< 1.5$  gm/kg/day) within the desired range
12. Follicular phase of the menstrual cycle (determined by counting days and by measuring  $17\beta$ -estradiol levels)
13. Not currently using hormonal contraceptive agents

**Electronic Table B: Characteristics in hyperfiltering and normofiltering subjects (mean $\pm$ SD)**

| Parameter                                              | Hyperfiltering group<br>(n=20) | Normofiltering group<br>(n=18) |
|--------------------------------------------------------|--------------------------------|--------------------------------|
| Age (years)                                            | 20 $\pm$ 4                     | 22 $\pm$ 5                     |
| Gender (men:women)                                     | 13:7                           | 12:6                           |
| Diabetes Duration (years)                              | 15 $\pm$ 4                     | 17 $\pm$ 5                     |
| Body Mass Index (kg/m <sup>2</sup> )                   | 25.7 $\pm$ 3.9                 | 25.2 $\pm$ 2.2                 |
| Albumin excretion rate ( $\mu\text{g}/\text{minute}$ ) | 5.5 $\pm$ 4.1                  | 3.9 $\pm$ 5.1                  |
| Sodium excretion (mmol/day)                            | 270 $\pm$ 71                   | 257 $\pm$ 92                   |
| Protein intake (gm/kg/day)                             | 0.98 $\pm$ 0.41                | 0.90 $\pm$ 0.46                |
| Hemoglobin A1C (%)                                     | 8.6 $\pm$ 0.4                  | 8.3 $\pm$ 0.2                  |
| Estradiol in women (pmol/L)                            | 140 $\pm$ 38                   | 184 $\pm$ 84                   |

Urinary albumin excretion rate was determined from a 24 hour urine collection by immunoturbidimetry  
HbA1C was measured by high-performance liquid chromatography.
